# Supplementary material
Source: publisher site journal article supplement (https://www.dovepress.com/article/414164)
Supplement: Supplementary file 1 [file get_supplementary_file.php]

TableS1 Correlation between indices from MBPT at baseline

|  | | PRI | CIR | PD20 |
| --- | --- | --- | --- | --- |
| PRI | correlation coefficients | 1 | .182 | -.278a |
| P values |  | .161 | .031 |
| CIR | correlation coefficients | .182 | 1 | -.327a |
| P values | .161 |  | .011 |
| PD20 | correlation coefficients | -.278a | -.327a | 1 |
| P values | .031 | .011 |  |

a. P values < 0.05.

TableS2 Correlation between PRI and inflammation factors at baseline

|  | | FENO | CaNO | EOS |
| --- | --- | --- | --- | --- |
| PRI | correlation coefficients | -0.020 | -0.017 | -0.015 |
| P values | 0.879 | 0.899 | 0.908 |

TableS3 Correlation between PRI and airway obstruction at baseline

|  |  | FEV1% | FVC | FEV1/FVC | FEF75 | FEF50 | FEF25 |
| --- | --- | --- | --- | --- | --- | --- | --- |
| PRI | correlation coefficients | -0.097 | -0.075 | -0.162 | -0.188 | -0.167 | -0.155 |
| P values | 0.456 | 0.566 | 0.213 | 0.147 | 0.197 | 0.231 |
